# Supplementary material for: Determination of DNA methylation associated with Acer rubrum (red maple) adaptation to metals: analysis of global DNA modifications and methylation‐sensitive amplified polymorphism
Source: PubMed Central journal article supplement (PMC4983588; doi:10.1002/ece3.2320), 2016-07-22
Supplement: ECE3-6-5749-s001.pdf [file ECE3-6-5749-s001.pdf]

**A**

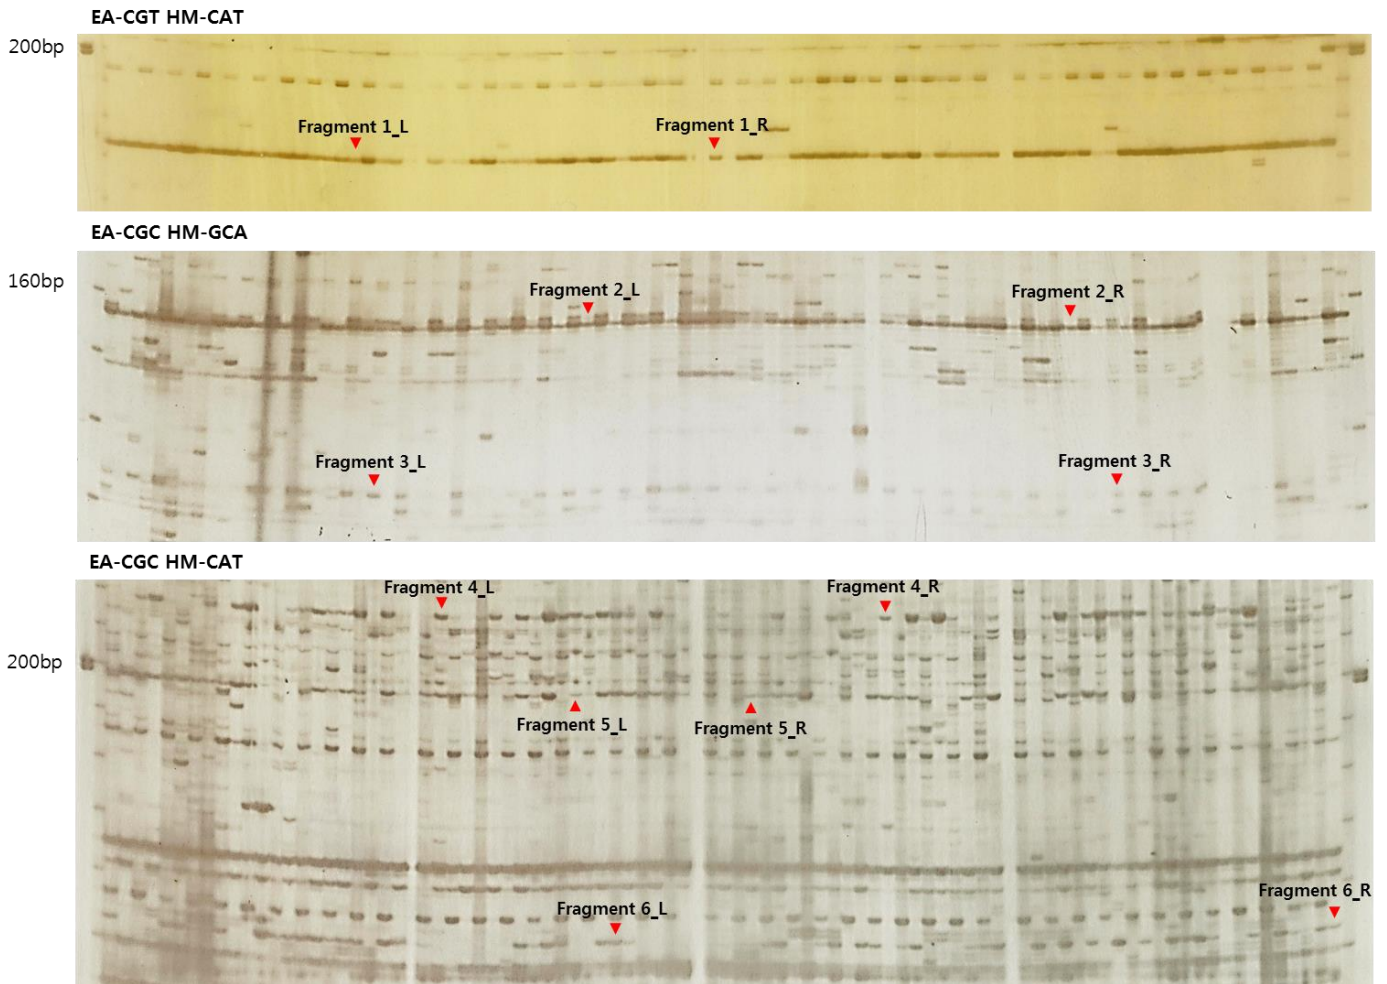

**B**

**EA-CGT HM-CAT**

**> Fragment 1**

```
L GACTGCGTACCAATCCGTTTGGTGATGATCACAAGGGTGCACAATACTTCTTACTACTCGTCAACAAGAAGTATGCAAAA
R GACTGCGTACCAATCCGTTTGGTGATGATCACAAGGGTGCACAATGCTTCTTACTACTCGTCAACAAGAAGTATGCAAAA
*****
L GTATGAGGTGTCAGCTGCAGATTCAATTAGATATTCTAAA
R GTATGAGGTGTCAGCCGCAGATTCAATTAGATATTCTAAA
*****
```

**EA-CGC HM-GCA**

**> Fragment 2**

```
L CATGAGTCCTGCTCGGGCACCCACTACCAATCCGAAGGCGACGTGTGTTGATTTTTGGTGGGAGATTCCCTTCTACTAC
R CATGAGTCCTGCTCGGGCACCCACTACCAATCCGAAGGCGACGTGTGTTGATTTTTGGTGGGAGATTCCCTTCTACTAC
*****
L ATTTCTATATTAGACCTCTCGTATAACGGTATAAGCATTGTTTGGGGAAAAGCCACGCGGAATTGGTACGCAGTC
R ATTTCTATATTAGACCTCTCGTATAACGGTATAAGCATTGTTTGGGGAAAAGCCACGCGGAATTGGTACGCAGTC
*****
```

**> Fragment 3**

```
L CATGAGTCCTGCTCGGGCAATGGAGTCGGAATGATGTAAACTTTTACAGTTGATGCTTTTTCGGCGAGATCTTCAAAC
R CATGAGTCCTGCTCGGGCAATGGAGTCGGAATGATGTAAACTTTTACAGTTGATGCTTTTTCGGTGAGATCTTCAAAC
*****
L CACAACCTTTGGTTGTGTGGCATGCCCTTTTTAGCGGAATTGGTACGCAGTC
R CACAACCTTTGGTTGTGTGGCATGCCCTTTTTAGCGGAATTGGTACGCAGTC
*****
```

**EA-CGC HM-CAT**

**> Fragment 4**

**L** CATGAGTCCTGCTCGGCATGGGCATCTGCCGTGTCGCGTCCCAAACGACTCTAAAATATATCCCTTAAATGATGCCTAGAAT  
**R** CATGAGTCCTGCTCGGCATGGGCATCTGCCGTGTCGCGTCCCAAACGACTCTAAAATATATCCCTTAAATGATGCCTAGAAT  
\*\*\*\*\*  
**L** AATTAATAATCTGTGTGAAAGCCTCCAACAATTAAAATGTGCAAAGTTAAAAGCCAAATAAGGCTTAGAGGATTTTTGTAAA  
**R** AATTAATAATCTGTGTGAAAGCCTCCAACAATTAAAATGTGCAAAGTTAAAAGCCAAATAAGGCTTAGAGGATTTTTGTAAA  
\*\*\*\*\*  
**L** TTTCTAAAAGCCTAAAATGCGTAAATAAATTTAGCGGAATTGGTACGCAGTC  
**R** TTTCTAAAAGCCTAAAATGCGTAAATAAATTTAGCGGAATTGGTACGCAGTC  
\*\*\*\*\*

**> Fragment 5**

**L** CATGAGTCCTGCTCGGCATAGATCTCGGGCGGGGATGGGATGGCAGAGGCGAGATGGATCGCCGACGATTCCTCTCTTTTT  
**R** CATGAGTCCTGCTCGGCATAGATCTCGGGCGGGGATGGGATGGCAGAGGCGAGATGGATCGCCGACGATTCCTCTCTTTTT  
\*\*\*\*\*  
**L** CTCTCTGTTTTCTTTTTCTTTAATTAATCGGAAATCCAAAACCCCTCCACACAGGGTTTACAATTATGACATGCCGATCCGTTT  
**R** CTCTCTGTTTTCTTTTTCTTTAATTAATCGGAAATCCAAAACCCCTCCACACAGGGTTTACAATTATGACATGCCGATCCGTTT  
\*\*\*\*\*  
**L** CAGACACTTGCGGAATTGGTACGCAGTC  
**R** CAGACACTTGCGGAATTGGTACGCAGTC  
\*\*\*\*\*

**> Fragment 6**

**L** CATGAGTCCTGCTCGGCATGGACGAGGCCCAATATGGTAGCGATCCATCTCAGTGTGGCCTCTAGTTAAATCAATGGGCCGTCAGATTGGA  
**R** CATGAGTCCTGCTCGGCATGGACGAGGCCCAATATGGTAGCGATCCATCTCAGTGTGGCCTCTAGTTAAATCAATGGGCCGTCAGATTGGA  
\*\*\*\*\*  
**L** CCCACGTTTCGGCCGTC AATTTCTTTTGC GGGCTGAATGGGCGGAATTGGTACGCAGTC  
**R** CCCACGTTTCGGCCGTC AATTTCTTTTGC GGGCTGAATGGGCGGAATTGGTACGCAGTC  
\*\*\*\*\*
