# Supplementary material for: Determination of DNA methylation associated with Acer rubrum (red maple) adaptation to metals: analysis of global DNA modifications and methylation‐sensitive amplified polymorphism
Source: PubMed Central journal article supplement (PMC4983588; doi:10.1002/ece3.2320), 2016-07-22
Supplement: ECE3-6-5749-s002.pdf [file ECE3-6-5749-s002.pdf]

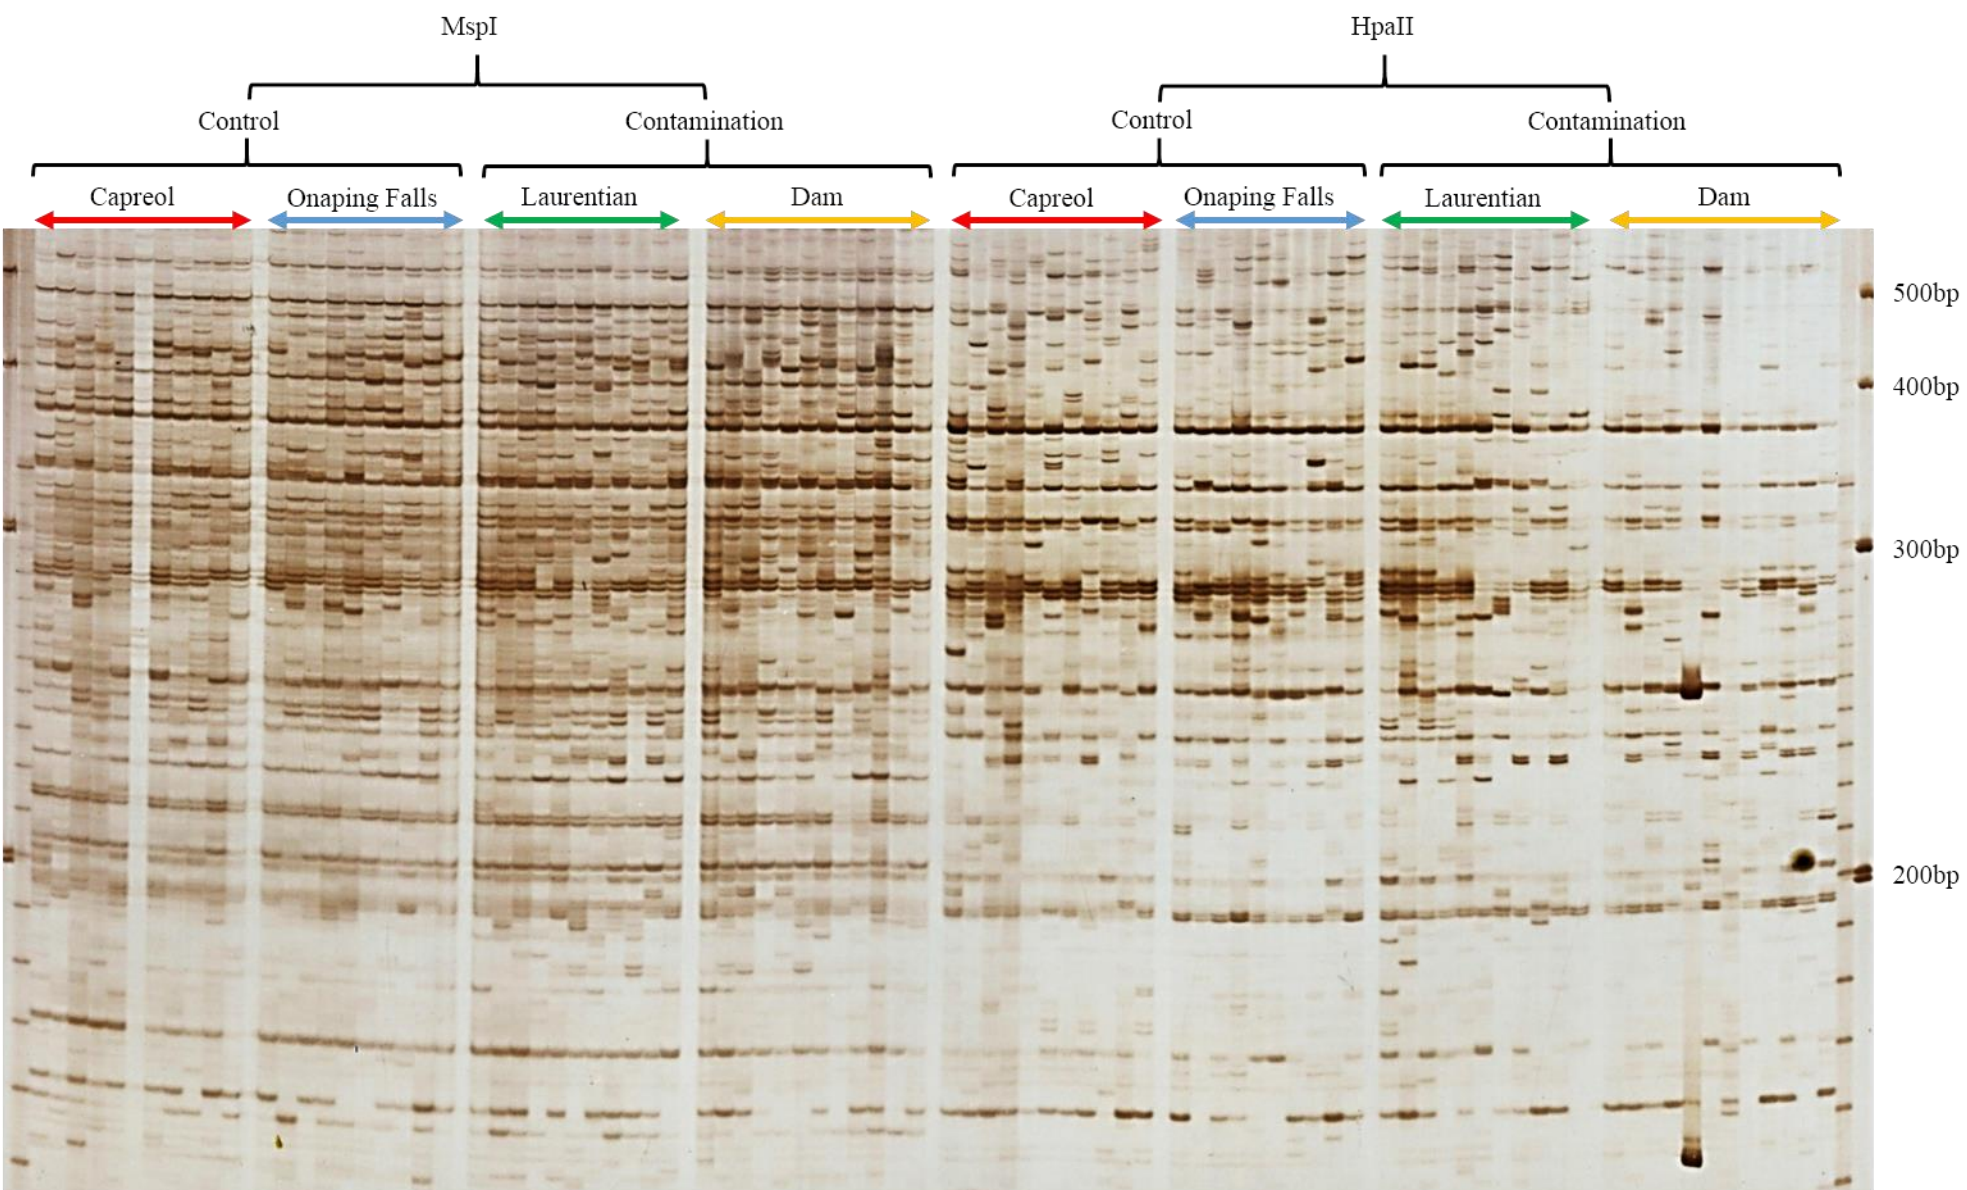

Supplementary Figure 2a

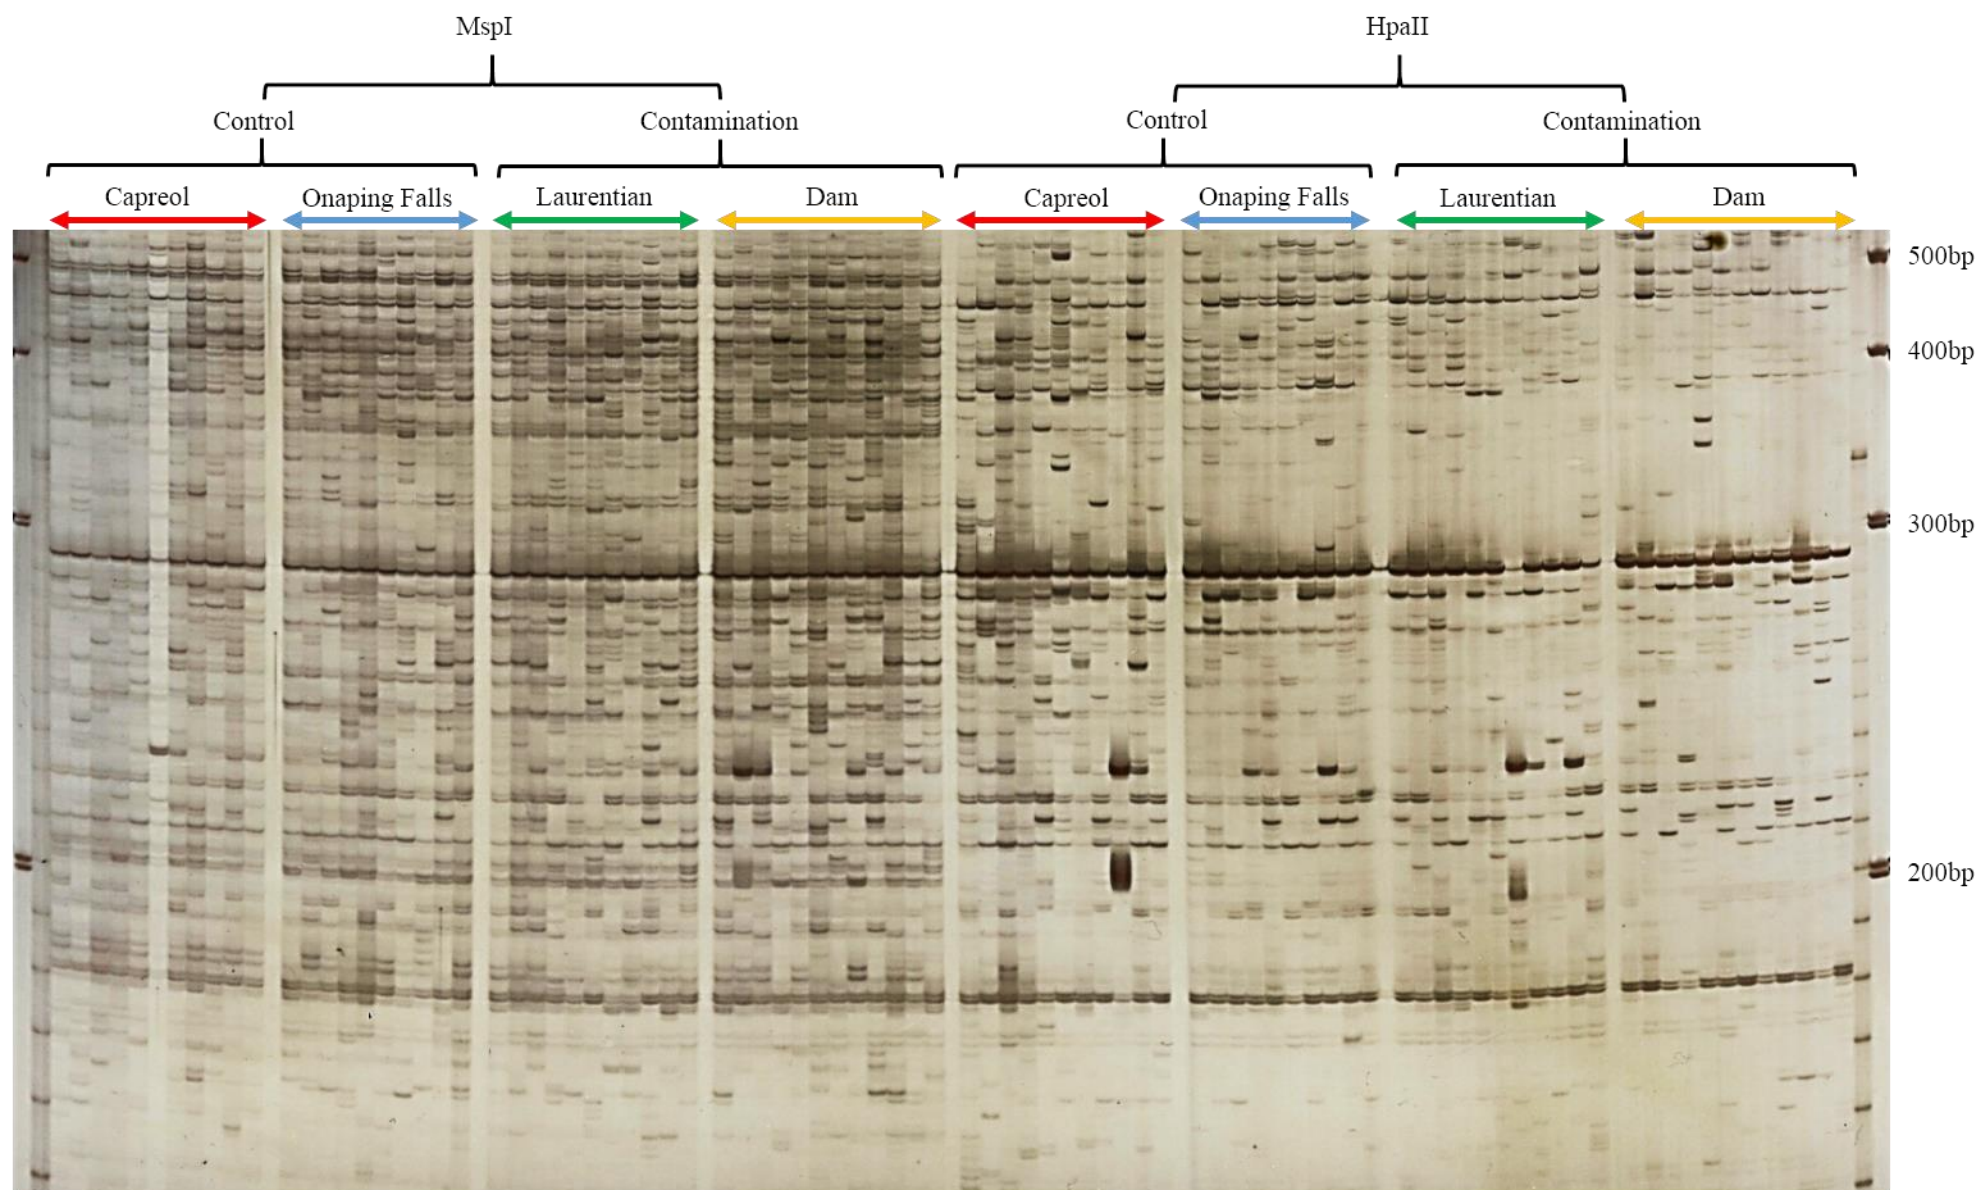

Supplementary Figure 2b

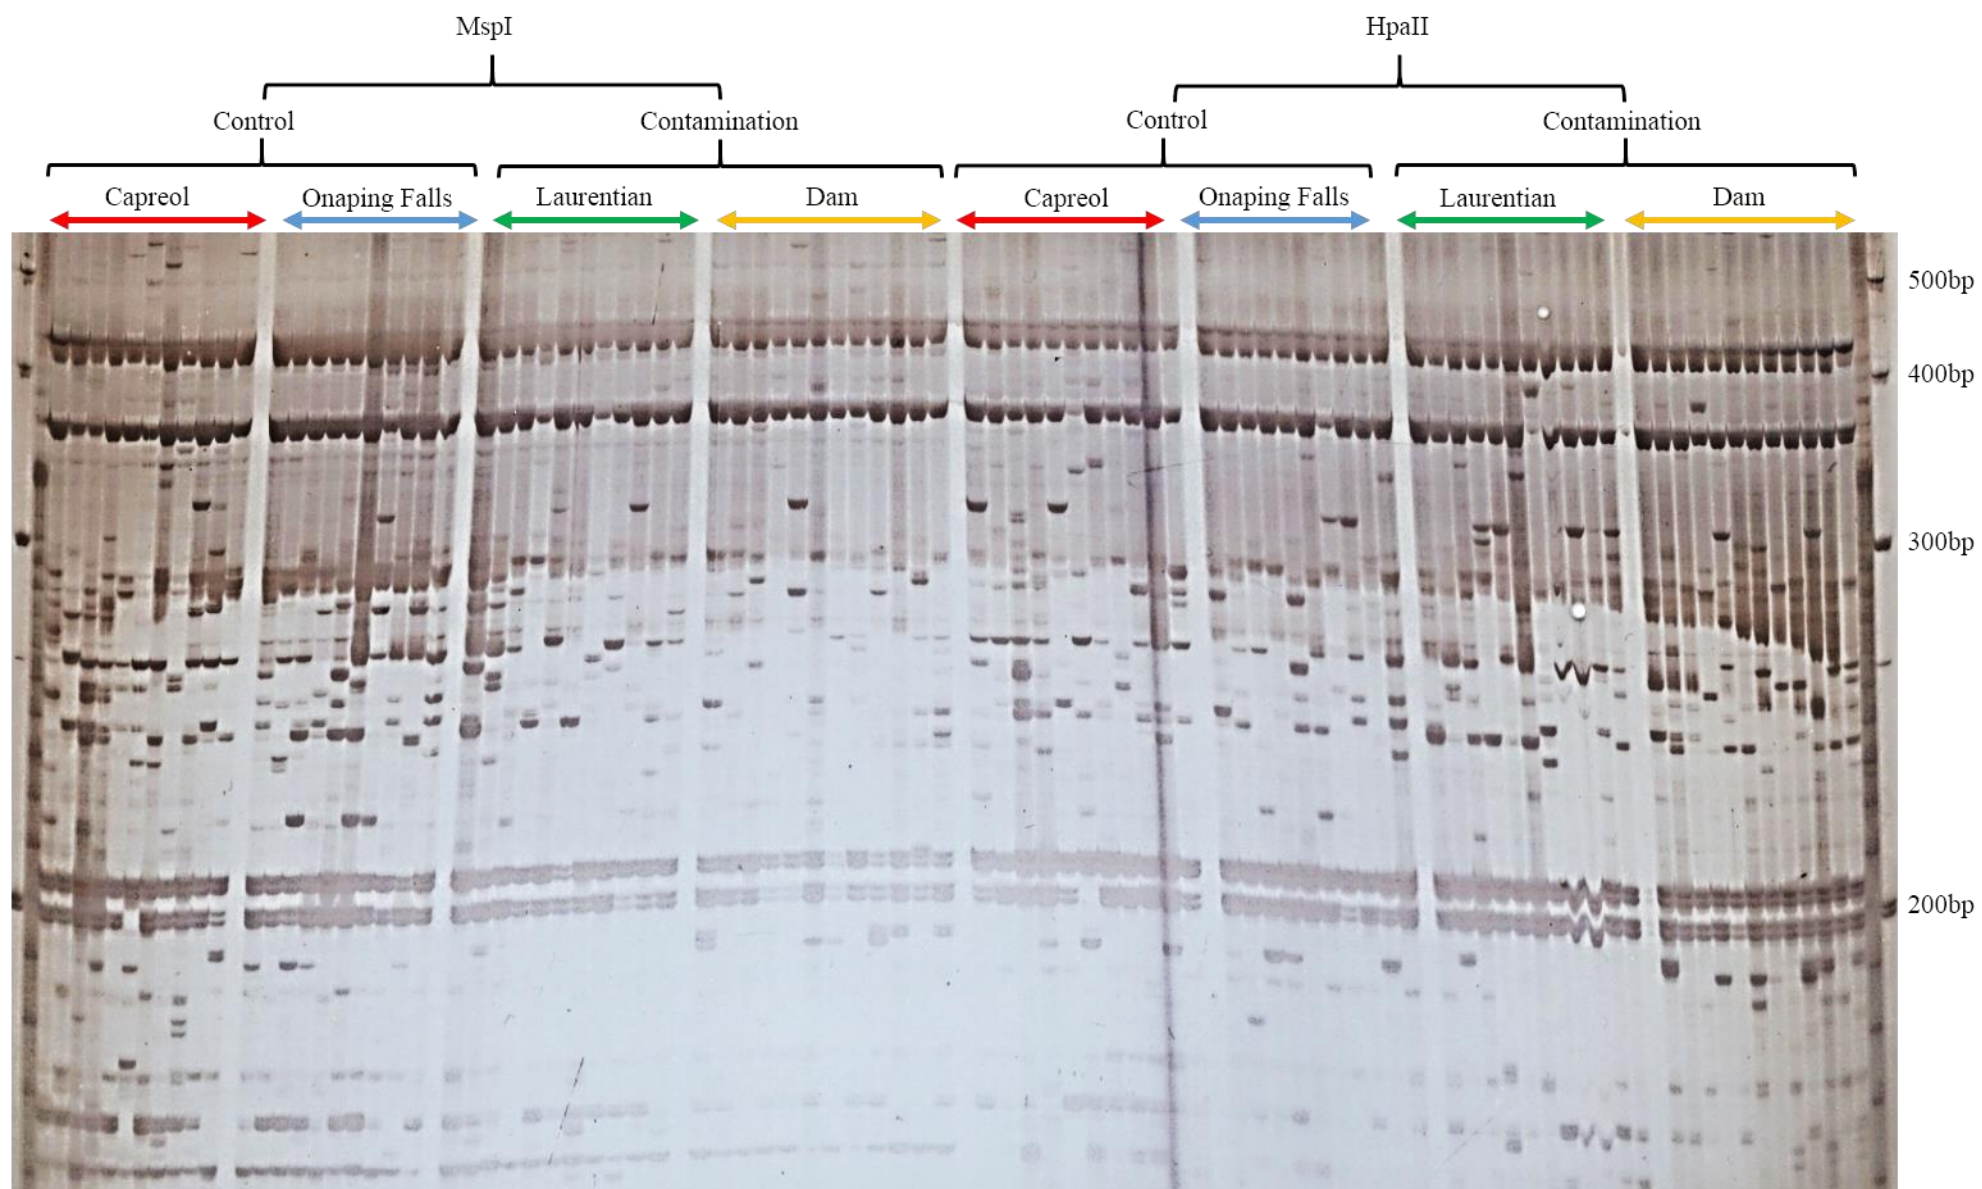

Supplementary Figure 2c

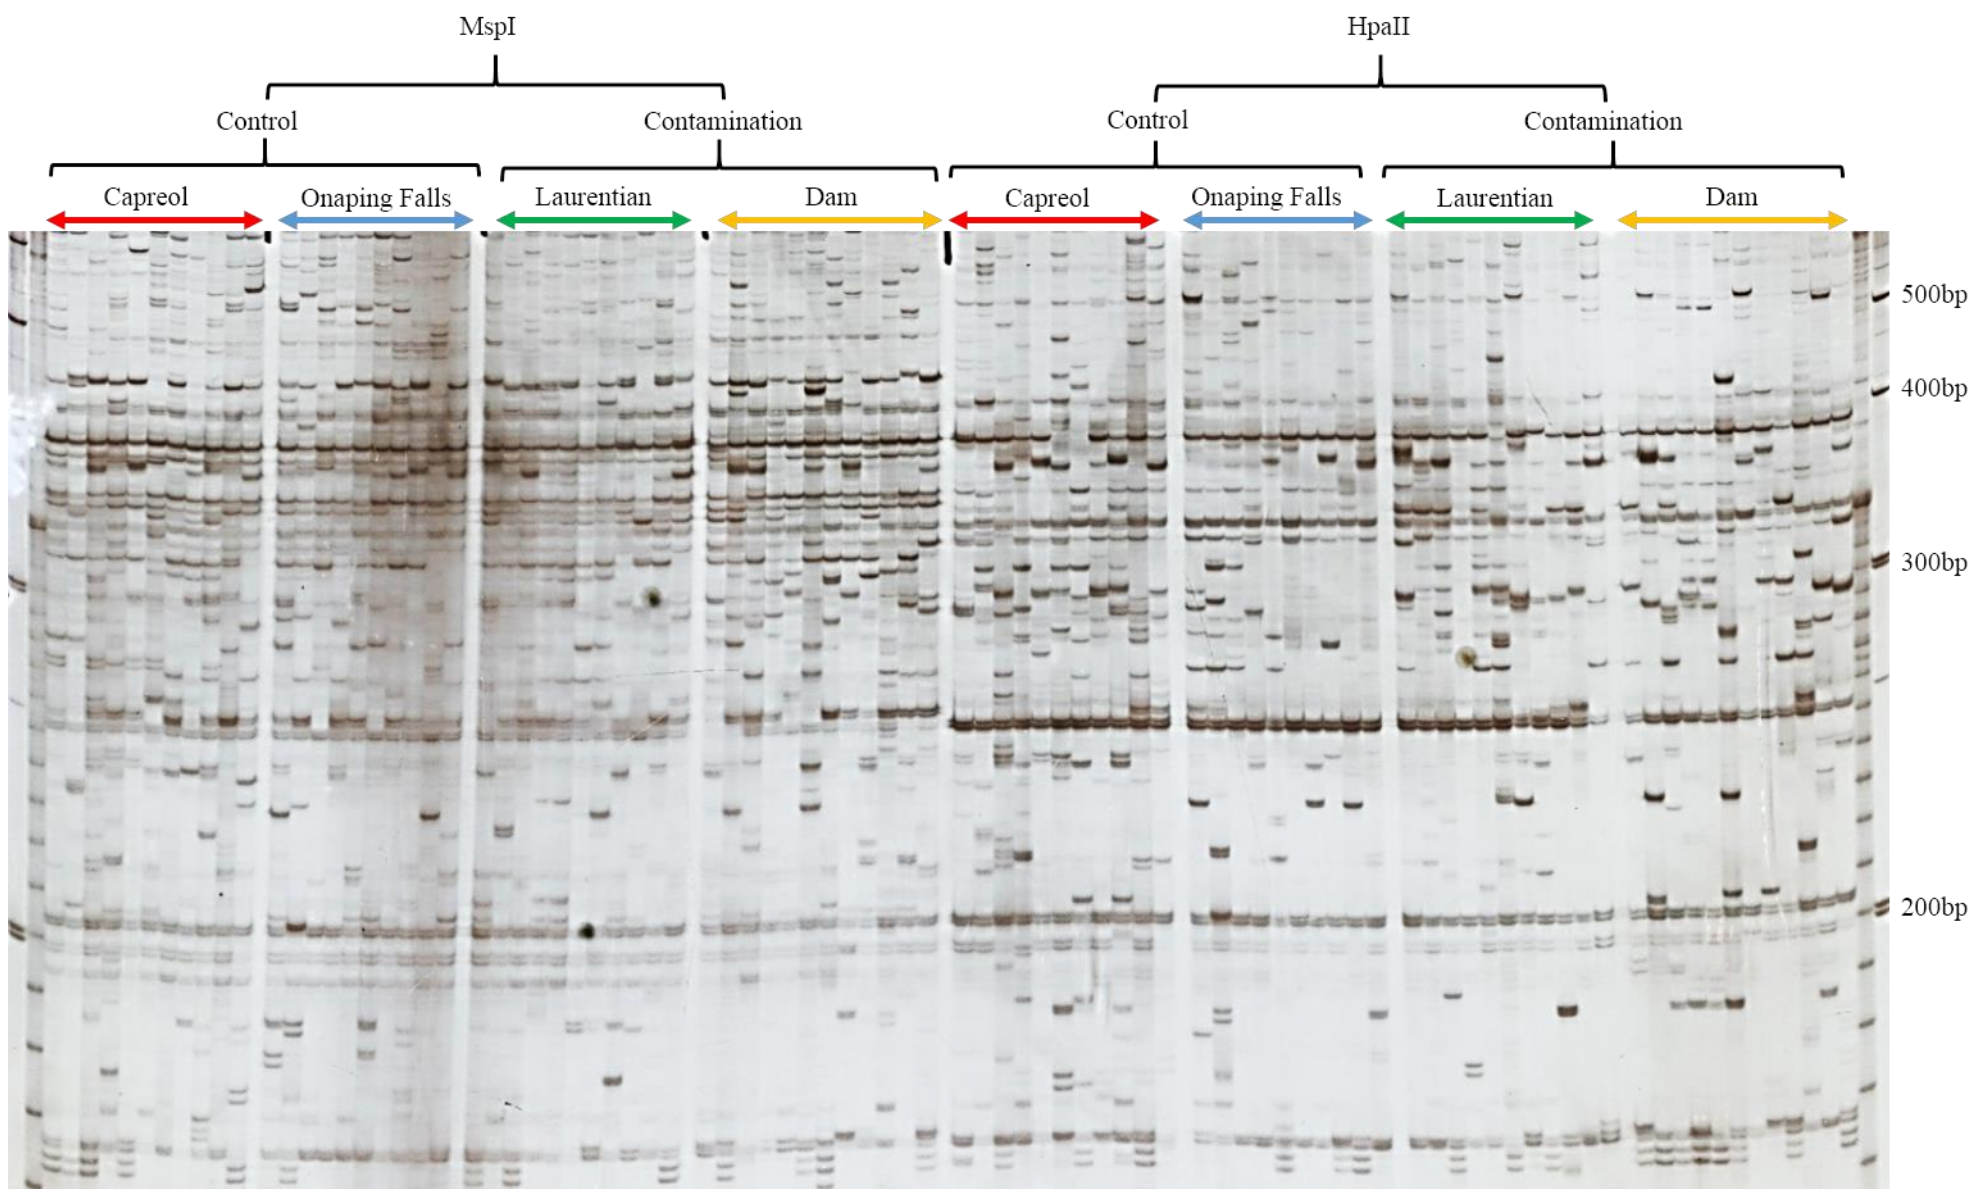

Supplementary Figure 2d

MH  
S P  
P A  
I II

Control

Contamination

Capreol

Onaping Falls

Laurentian

Dam

500bp

400bp

300bp

200bp

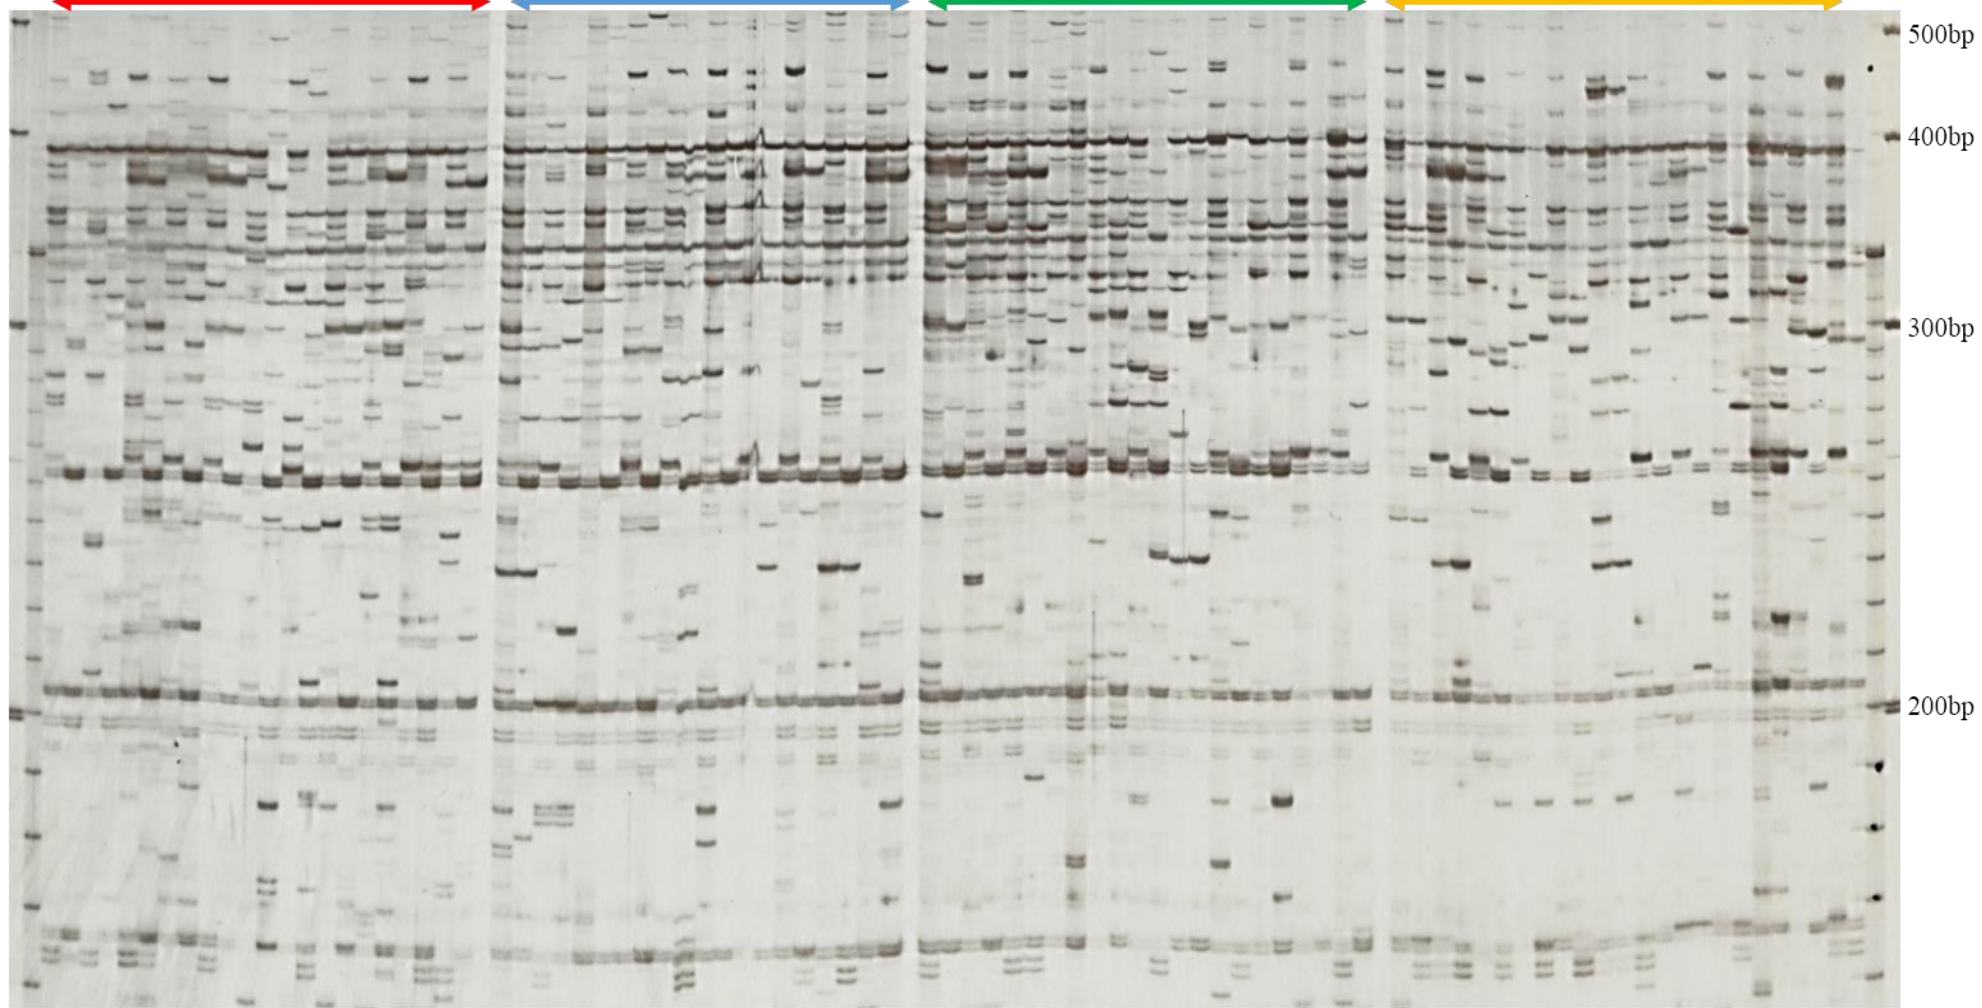

Supplementary Figure 2e

MH  
S P  
P A  
I II

Control

Contamination

Capreol

Onaping Falls

Laurentian

Dam

500bp

400bp

300bp

200bp

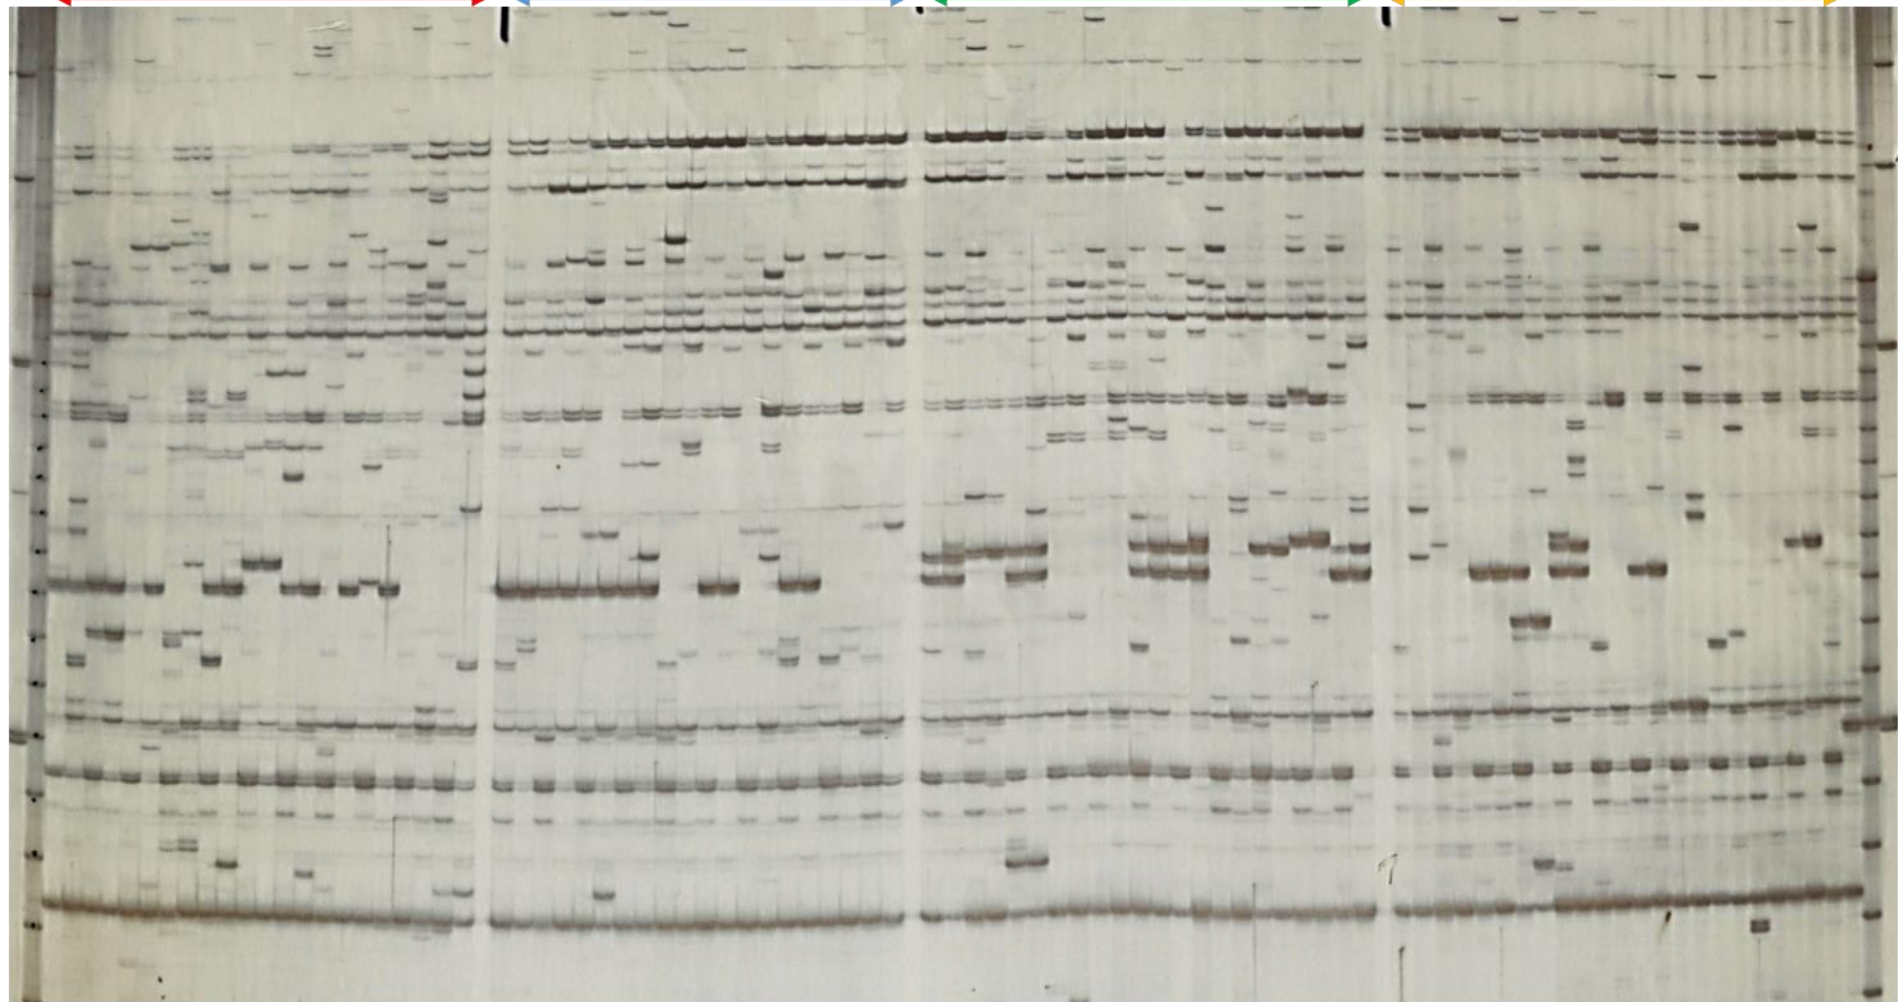

Supplementary Figure 2f

MH  
S P  
P A  
I II

Control

Contamination

Capreol

Onaping Falls

Laurentian

Dam

500bp

400bp

300bp

200bp

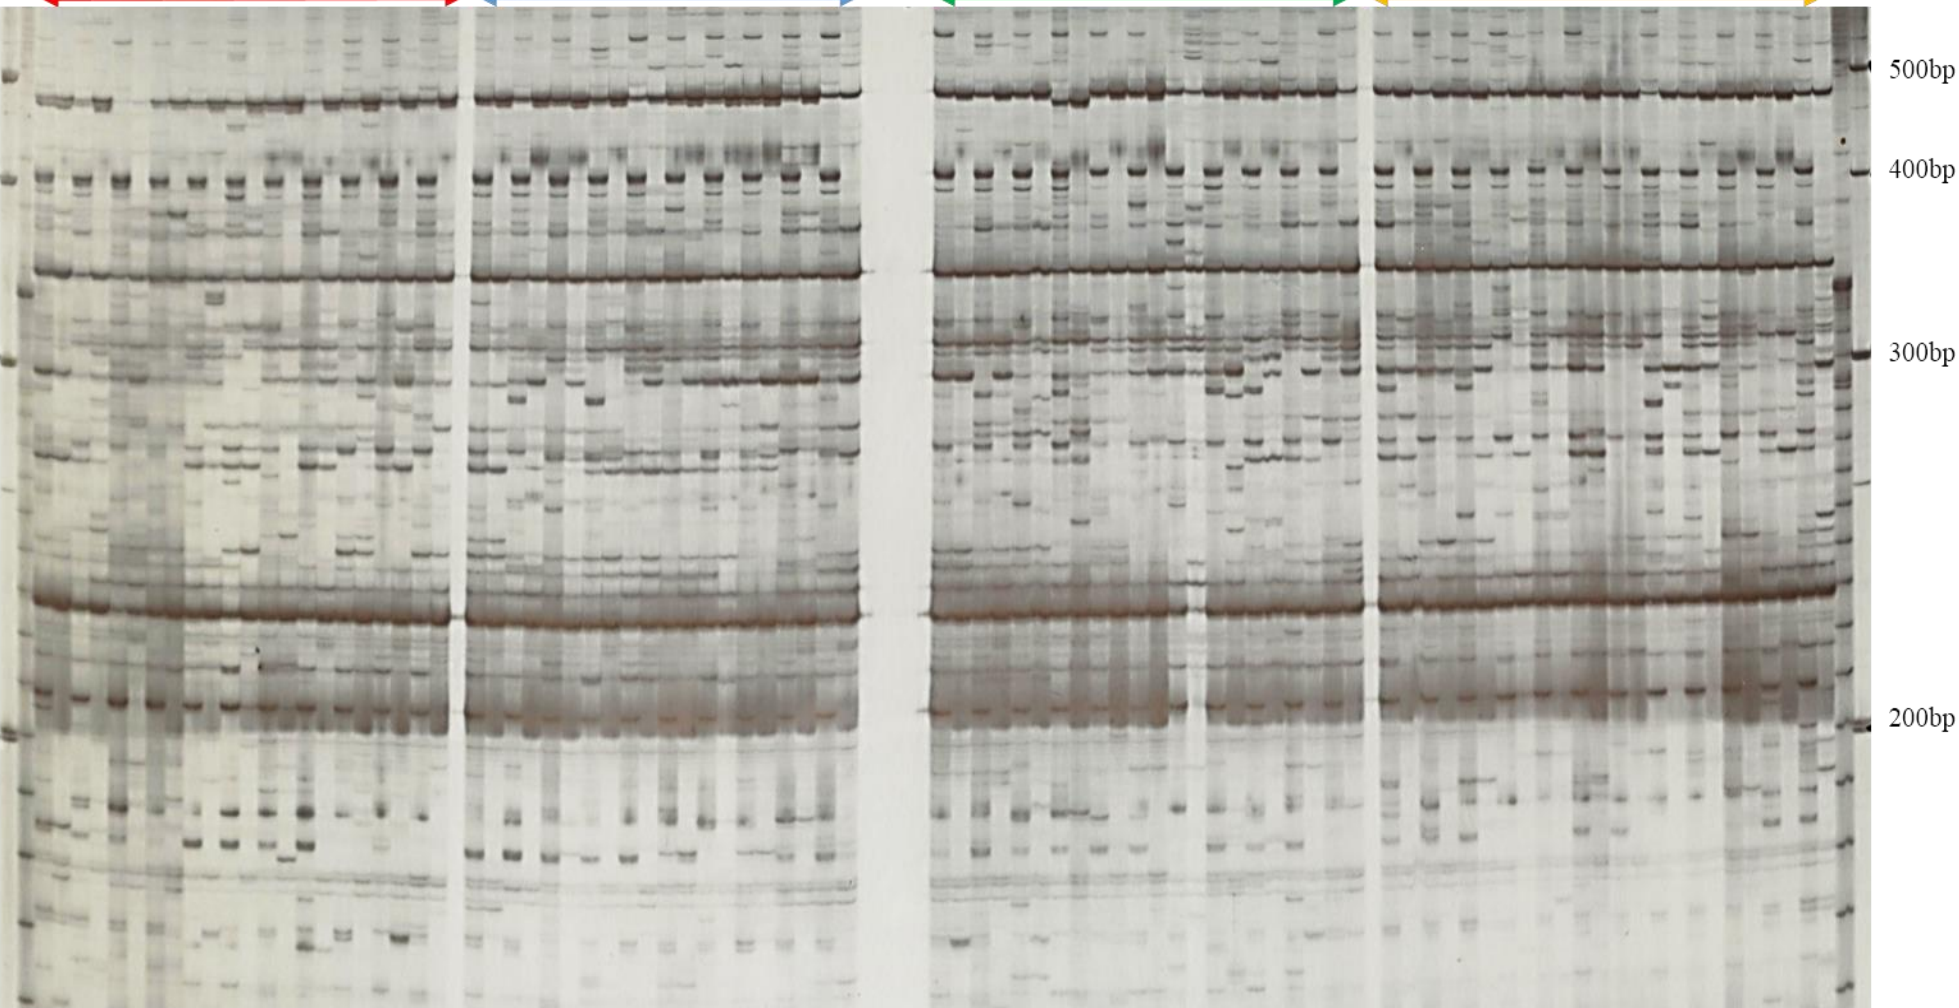

Supplementary Figure 2g

MH  
S P  
P A  
I II

Control

Contamination

Capreol

Onaping Falls

Laurentian

Dam

500bp

400bp

300bp

200bp

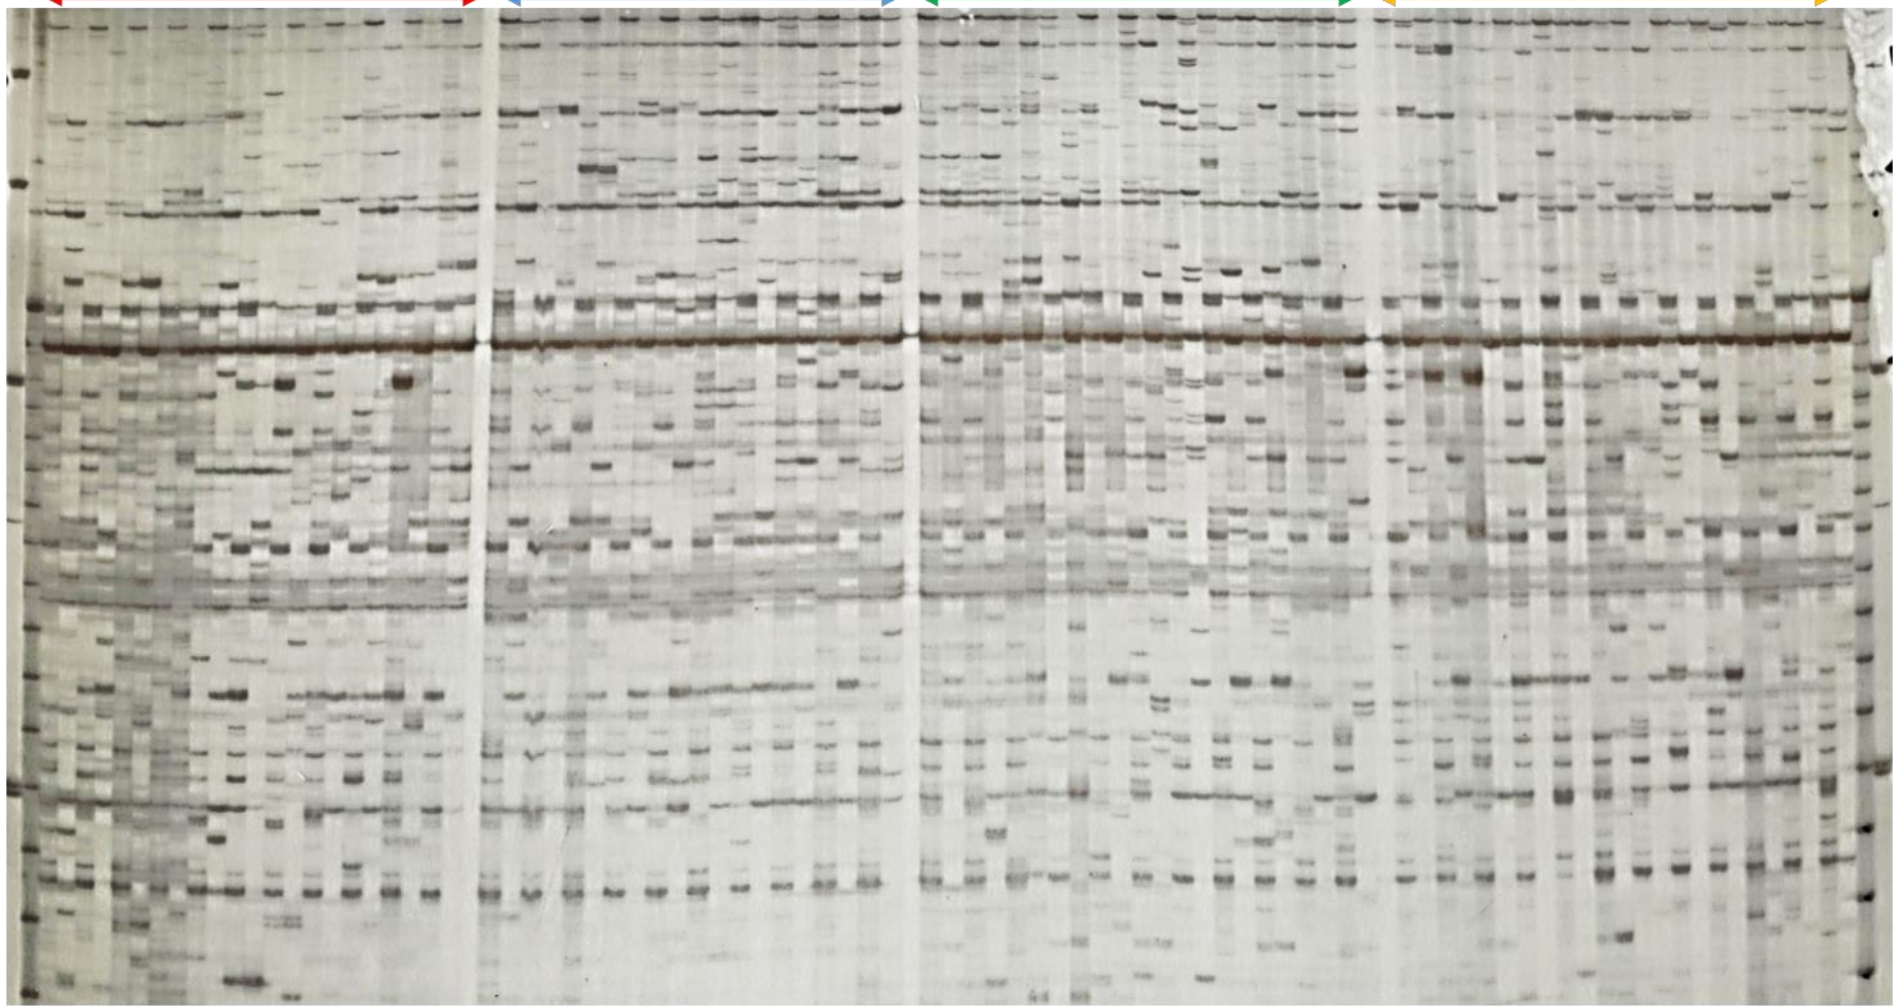

Supplementary Figure 2h
